# Supplementary material for: Artificial intelligence reveals features associated with breast cancer neoadjuvant chemotherapy responses from multi-stain histopathologic images
Source: PubMed Central journal article supplement (PMC9883475; doi:10.1038/s41698-023-00352-5), 2023-01-27
Supplement: 41698_2023_352_MOESM1_ESM.pdf [file 41698_2023_352_MOESM1_ESM.pdf]

## Supplementary Information

# Artificial Intelligence Reveals Features Associated with Breast Cancer Neoadjuvant Chemotherapy Responses from Multi-stain Histopathologic Images

Zhi Huang<sup>1,2,†</sup>, Wei Shao<sup>3,†</sup>, Zhi Han<sup>3,4,11,†</sup>, Ahmad Mahmoud Alkashash<sup>5</sup>, Carlo De la Sancha<sup>5</sup>, Anil V. Parwani<sup>6</sup>, Hiroaki Nitta<sup>7</sup>, Yanjun Hou<sup>8</sup>, Tongxin Wang<sup>9</sup>, Paul Salama<sup>2</sup>, Maher Rizkalla<sup>2</sup>, Jie Zhang<sup>10</sup>, Kun Huang<sup>2,4,11,\*</sup>, and Zaibo Li<sup>6,\*</sup>

<sup>1</sup> School of Electrical and Computer Engineering, Purdue University, West Lafayette, IN, 47907, USA

<sup>2</sup> Department of Electrical and Computer Engineering, Indiana University – Purdue University Indianapolis, Indianapolis, IN, 46202, USA

<sup>3</sup> Department of Medicine, Indiana University School of Medicine, Indianapolis, IN, 46202, USA

<sup>4</sup> Regenstrief Institute, Indianapolis, IN, 46202, USA

<sup>5</sup> Department of Pathology, Indiana University School of Medicine, Indianapolis, IN, 46202, USA

<sup>6</sup> Department of Pathology, The Ohio State University Wexner Medical Center, Columbus, OH, 43210, USA

<sup>7</sup> Roche Tissue Diagnostics, 1910 E. Innovation Park Drive, Tucson, AZ, 85755, USA

<sup>8</sup> University Hospitals Cleveland Medical Center, Case Western Reserve University, 11100 Euclid Avenue, Cleveland, OH, 44106, USA

<sup>9</sup> Department of Computer Science, Indiana University Bloomington, Bloomington, IN, 47408, USA

<sup>10</sup> Department of Medical and Molecular Genetics, Indiana University School of Medicine, Indianapolis, IN, 46202, USA

<sup>11</sup> Department of Biostatistics and Health Data Science, Indiana University School of Medicine, Indianapolis, IN, 46202, USA

† These authors contributed equally to this work.

\* To whom the correspondence should be addressed: Zaibo Li ([Zaibo.Li@osumc.edu](mailto:Zaibo.Li@osumc.edu)) and Kun Huang ([kunhuang@iu.edu](mailto:kunhuang@iu.edu)).

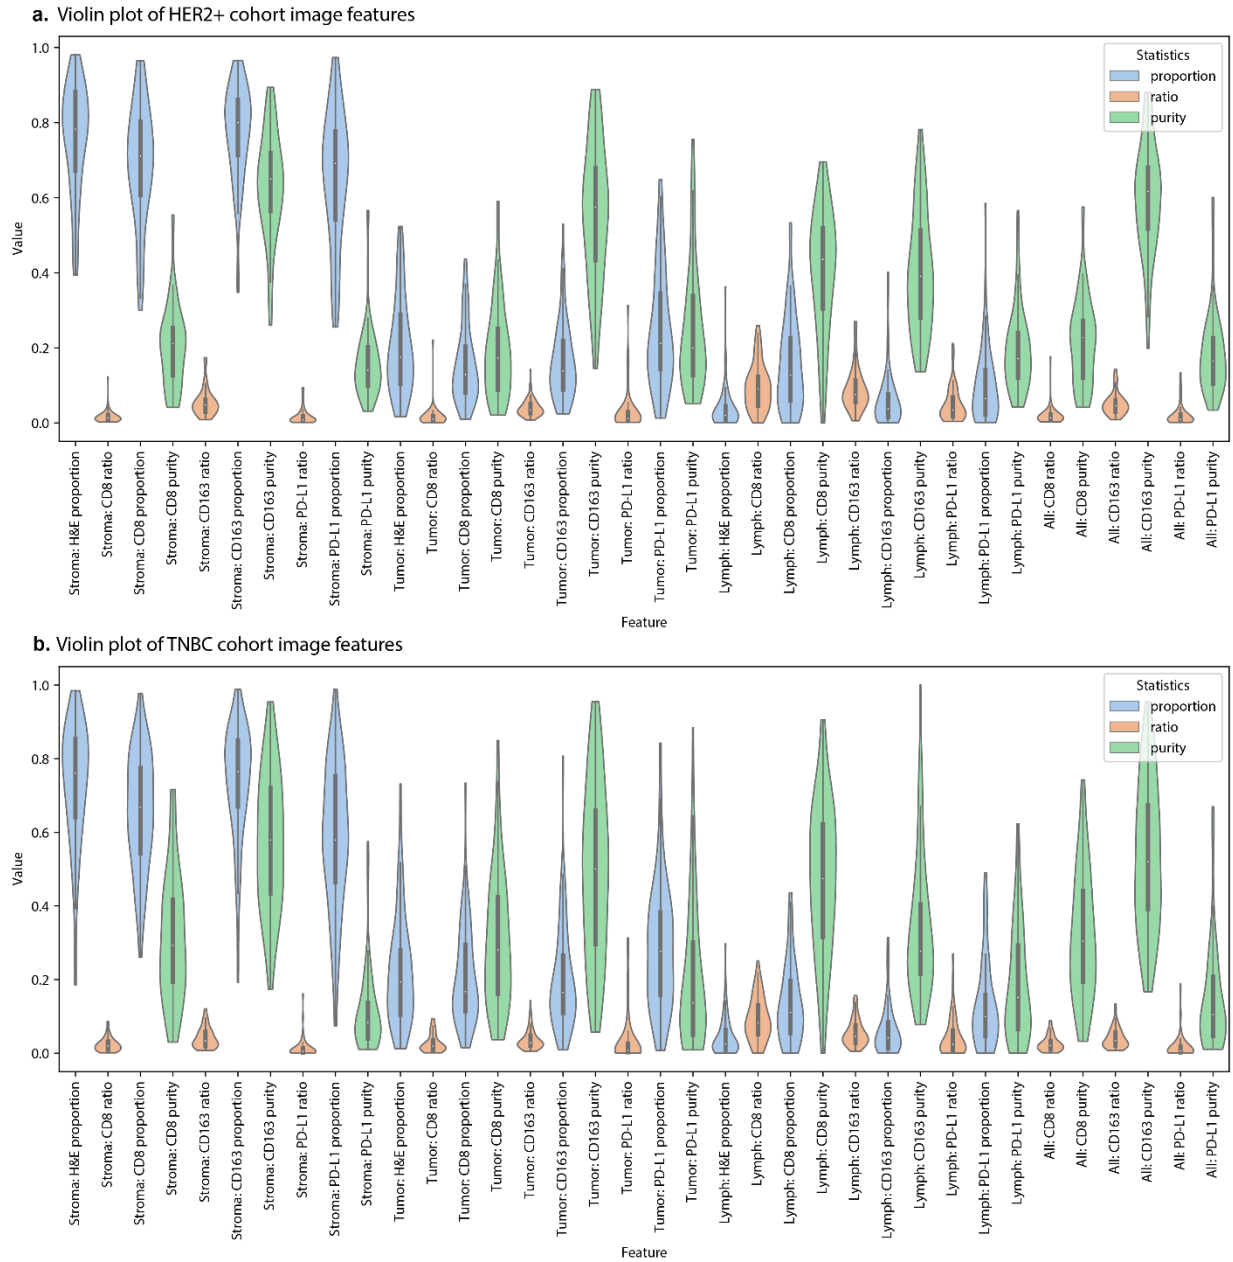

**Supplementary Figure 1.** Violin plot of IMPRESS feature expressions in HER2+ cohort (A) and TNBC cohort (B). For boxplot inside the violin plot, the interior white dot represents the median value, the upper and lower box edges represent 75<sup>th</sup> and 25<sup>th</sup> percentile, and the upper and lower bars represent the 90<sup>th</sup> and 10<sup>th</sup> percentiles, respectively.

**a. Before non-rigid registration**

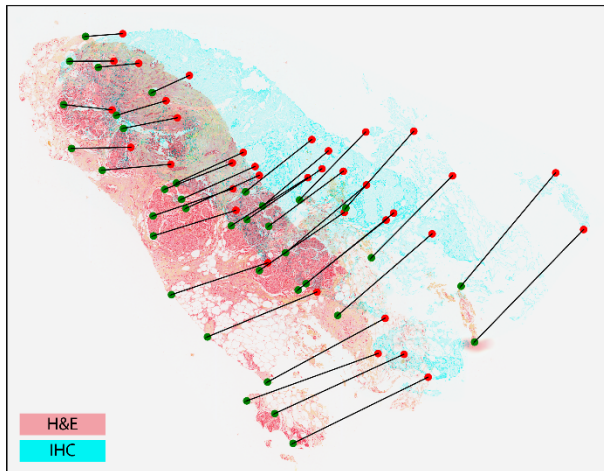

● Fixed reference ● Moving reference

**b. After non-rigid registration**

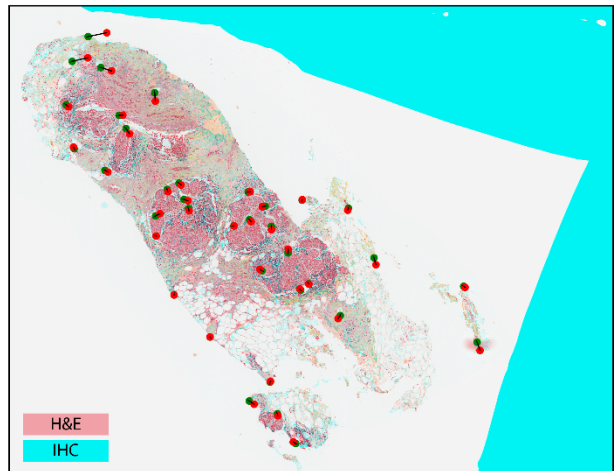

● Fixed reference ● Moving reference

**Supplementary Figure 2.** An example H&E tissue (fixed reference) and the corresponding IHC tissue (moving reference) before the non-rigid registration (A) and after the non-rigid registration (B). Figure best viewed in color.

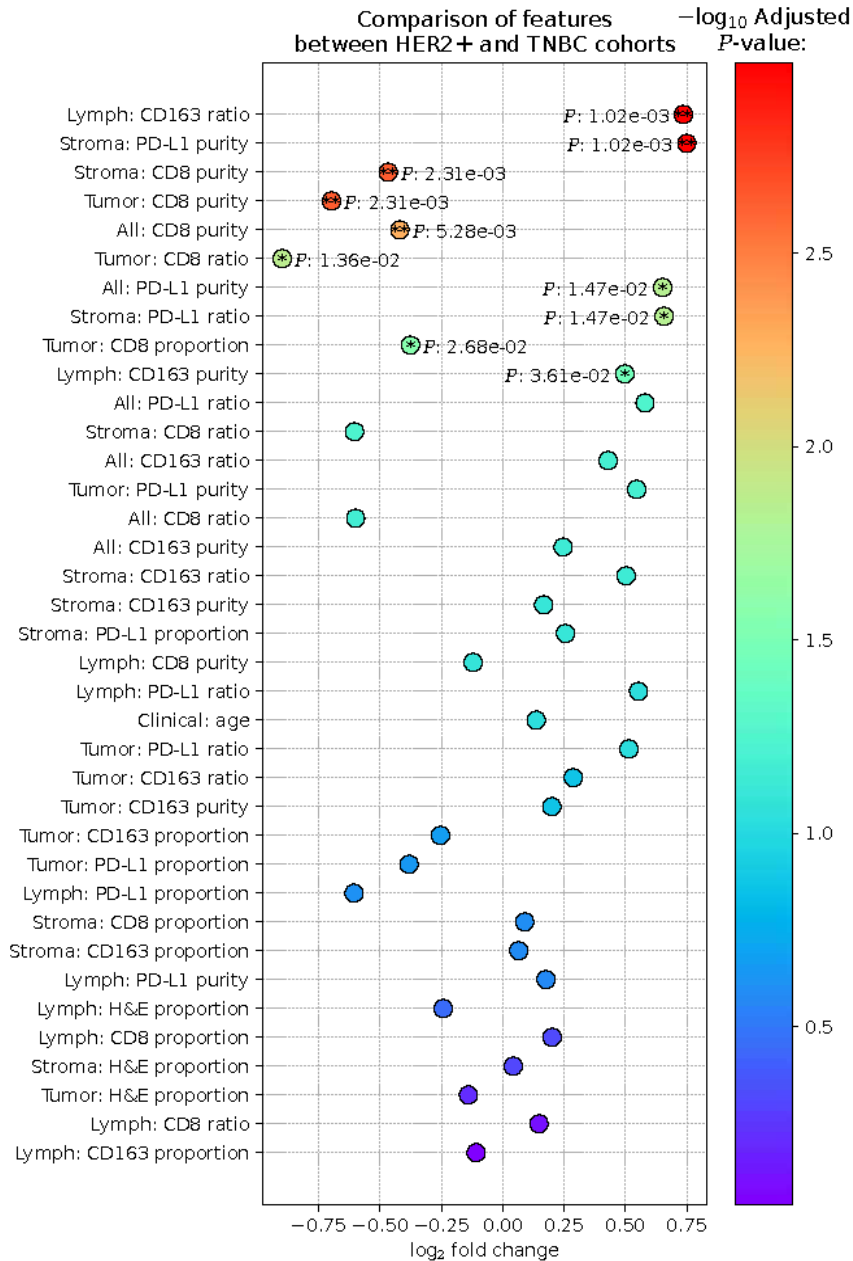

**Supplementary Figure 3.** Extracted IMPRESS and clinical features comparison between HER2+ and TNBC cohorts. Two-sided P-values were calculated based on Mann–Whitney U test, followed with B&H procedure for multiple test adjustment (FDR = 0.05). The fold change was calculated by the ratio of the median feature values between HER2+ and TNBC cohorts. Figure best viewed in color. Symbol for adjusted P-values: \*: < 0.05, \*\*: < 0.01, \*\*\*: < 0.001.

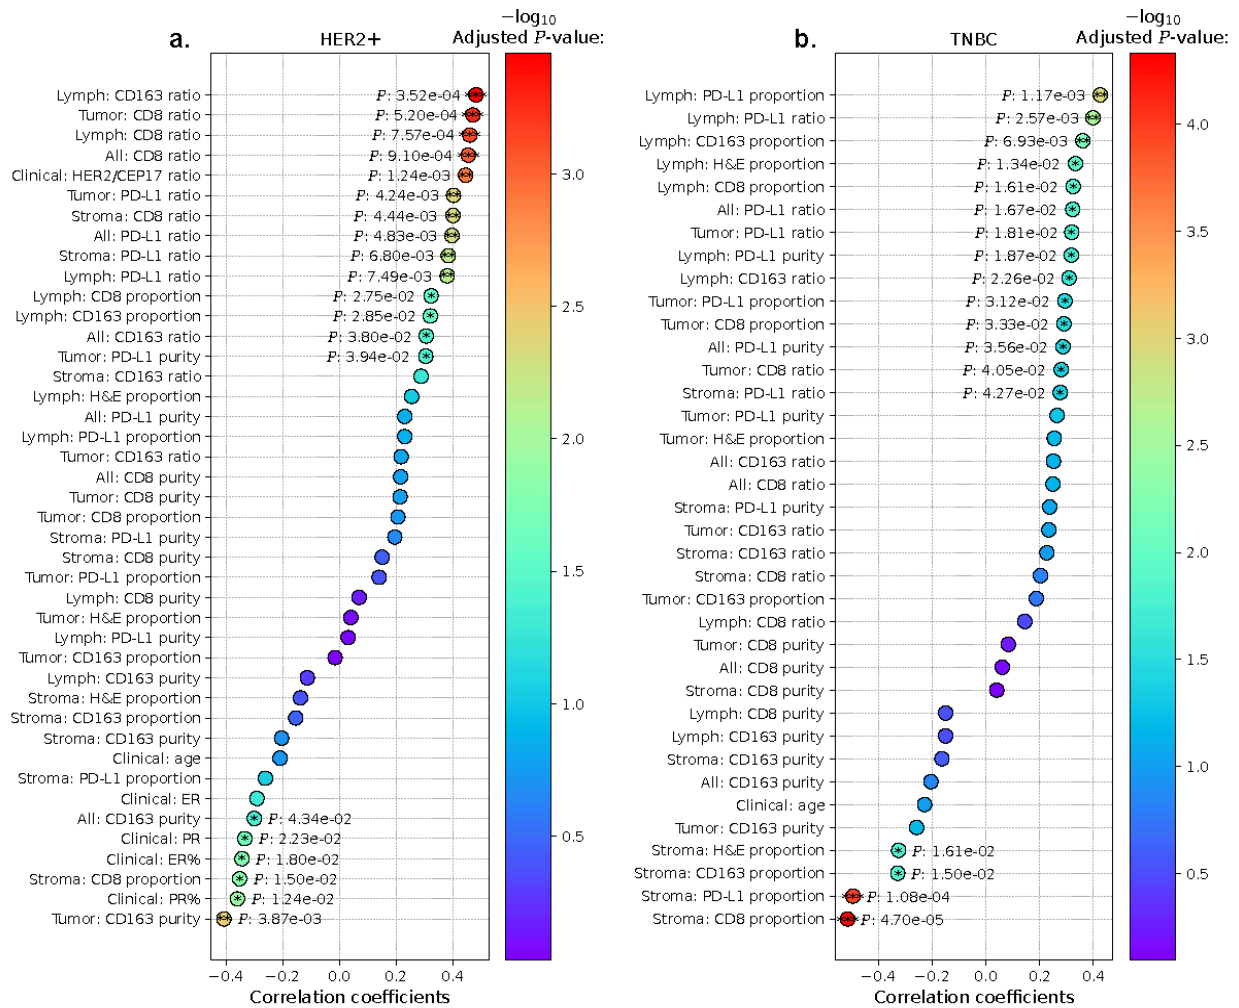

**Supplementary Figure 4.** (A) Univariate feature analysis with pCR in HER2+ cohort. (B) Univariate feature analysis with pCR in TNBC cohort. Two-sided P-values were calculated based on Spearman's rank correlations, followed with B&H procedure for multiple test adjustment (FDR = 0.05). Figure best viewed in color. Symbol for adjusted P-values: \*: < 0.05, \*\*: < 0.01, \*\*\*: < 0.001.

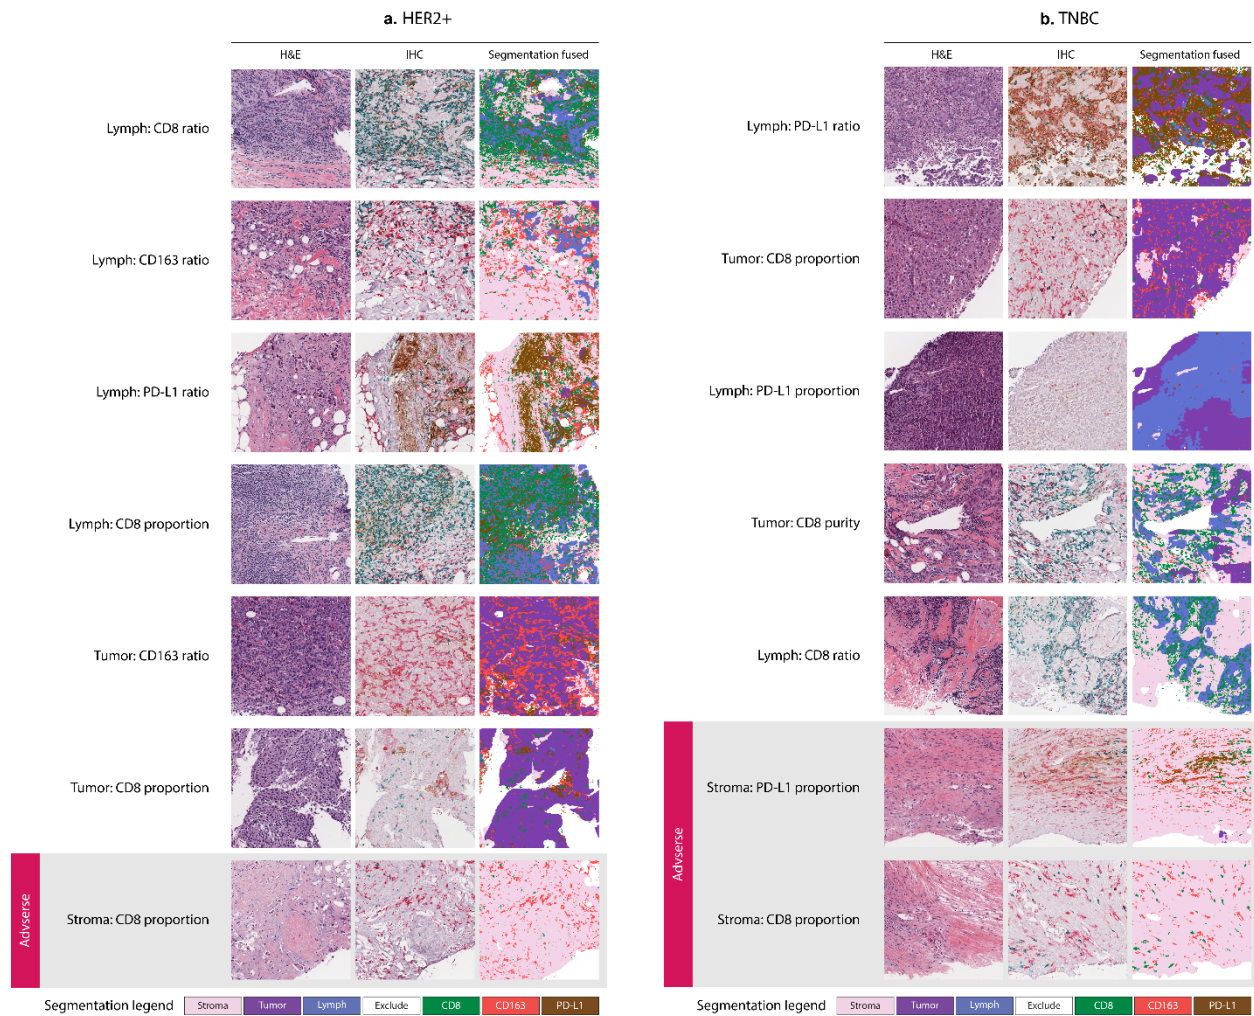

**Supplementary Figure 5.** Selected representative patches in HER2+ cohort (A) and TNBC cohort (B). Patches were derived from patient WSIs which achieved highest IMPRESS feature values among cohorts. Adverse prognostic markers were highlighted. Figure best viewed in color.

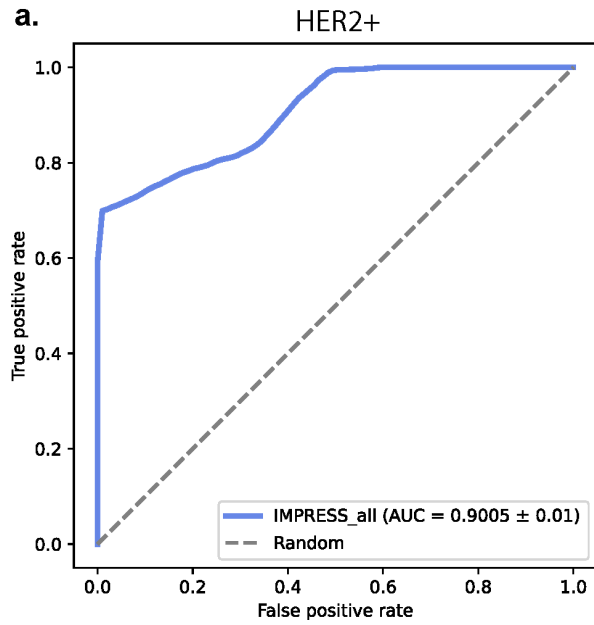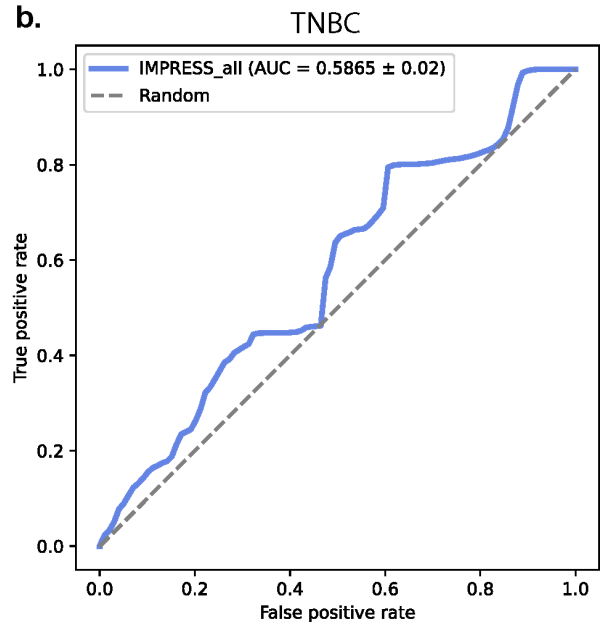

**Supplementary Figure 6.** Receiver operating characteristic curves for external validation dataset.

(A) HER2+ cohort; (B) TNBC cohort.

**Supplementary Table 1.** List of 36 IMPRESS features constructed from H&E and IHC images.

3 features can be constructed only from H&E image, 3 features can be only constructed from IHC image.

|    | <b>Feature name</b>               | <b>Explanation</b>                                                            | <b>Data source</b> |
|----|-----------------------------------|-------------------------------------------------------------------------------|--------------------|
| 1  | <i>Stroma: CD8 ratio</i>          | The area ratio of CD8 to stromal region.                                      | H&E+IHC            |
| 2  | <i>Stroma: CD163 ratio</i>        | The area ratio of CD163 to stromal region.                                    | H&E+IHC            |
| 3  | <i>Stroma: PD-L1 ratio</i>        | The area ratio of PD-L1 to stromal region.                                    | H&E+IHC            |
| 4  | <i>Stroma: CD8 proportion</i>     | The area ratio of CD8 in stromal region to all H&E regions.                   | H&E+IHC            |
| 5  | <i>Stroma: CD163 proportion</i>   | The area ratio of CD163 in stromal region to all H&E regions.                 | H&E+IHC            |
| 6  | <i>Stroma: PD-L1 proportion</i>   | The area ratio of PD-L1 in stromal region to all H&E regions.                 | H&E+IHC            |
| 7  | <i>Stroma: CD8 purity</i>         | In stromal region, the area ratio of CD8 to all IHC markers.                  | H&E+IHC            |
| 8  | <i>Stroma: CD163 purity</i>       | In stromal region, the area ratio of CD163 to all IHC markers.                | H&E+IHC            |
| 9  | <i>Stroma: PD-L1 purity</i>       | In stromal region, the area ratio of PD-L1 to all IHC markers.                | H&E+IHC            |
| 10 | <i>Tumor: CD8 ratio</i>           | The area ratio of CD8 to tumoral region.                                      | H&E+IHC            |
| 11 | <i>Tumor: CD163 ratio</i>         | The area ratio of CD163 to tumoral region.                                    | H&E+IHC            |
| 12 | <i>Tumor: PD-L1 ratio</i>         | The area ratio of PD-L1 to tumoral region.                                    | H&E+IHC            |
| 13 | <i>Tumor: CD8 proportion</i>      | The area ratio of CD8 in tumoral region to all H&E regions.                   | H&E+IHC            |
| 14 | <i>Tumor: CD163 proportion</i>    | The area ratio of CD163 in tumoral region to all H&E regions.                 | H&E+IHC            |
| 15 | <i>Tumor: PD-L1 proportion</i>    | The area ratio of PD-L1 in tumoral region to all H&E regions.                 | H&E+IHC            |
| 16 | <i>Tumor: CD8 purity</i>          | In tumoral region, the area ratio of CD8 to all IHC markers.                  | H&E+IHC            |
| 17 | <i>Tumor: CD163 purity</i>        | In tumoral region, the area ratio of CD163 to all IHC markers.                | H&E+IHC            |
| 18 | <i>Tumor: PD-L1 purity</i>        | In tumoral region, the area ratio of PD-L1 to all IHC markers.                | H&E+IHC            |
| 19 | <i>Lymph: CD8 ratio</i>           | The area ratio of CD8 to lymphocytes aggregated region.                       | H&E+IHC            |
| 20 | <i>Lymph: CD163 ratio</i>         | The area ratio of CD163 to lymphocytes aggregated region.                     | H&E+IHC            |
| 21 | <i>Lymph: PD-L1 ratio</i>         | The area ratio of PD-L1 to lymphocytes aggregated region.                     | H&E+IHC            |
| 22 | <i>Lymph: CD8 proportion</i>      | The area ratio of CD8 in lymphocytes aggregated region to all H&E regions.    | H&E+IHC            |
| 23 | <i>Lymph: CD163 proportion</i>    | The area ratio of CD163 in lymphocytes aggregated region to all H&E regions.  | H&E+IHC            |
| 24 | <i>Lymph: PD-L1 proportion</i>    | The area ratio of PD-L1 in lymphocytes aggregated region to all H&E regions.  | H&E+IHC            |
| 25 | <i>Lymph: CD8 purity</i>          | In lymphocytes aggregated region, the area ratio of CD8 to all IHC markers.   | H&E+IHC            |
| 26 | <i>Lymph: CD163 purity</i>        | In lymphocytes aggregated region, the area ratio of CD163 to all IHC markers. | H&E+IHC            |
| 27 | <i>Lymph: PD-L1 purity</i>        | In lymphocytes aggregated region, the area ratio of PD-L1 to all IHC markers. | H&E+IHC            |
| 28 | <i>All: CD8 ratio</i>             | The area ratio of CD8 to all H&E regions.                                     | H&E+IHC            |
| 29 | <i>All: CD163 ratio</i>           | The area ratio of CD163 to all H&E regions.                                   | H&E+IHC            |
| 30 | <i>All: PD-L1 ratio</i>           | The area ratio of PD-L1 to all H&E regions.                                   | H&E+IHC            |
| 31 | <i>All: CD8 purity</i>            | In all H&E regions, the area ratio of CD8 to all IHC markers.                 | IHC                |
| 32 | <i>All: CD163 purity</i>          | In all H&E regions, the area ratio of CD163 to all IHC markers.               | IHC                |
| 33 | <i>All: PD-L1 purity</i>          | In all H&E regions, the area ratio of PD-L1 to all IHC markers.               | IHC                |
| 34 | <i>Stroma: H&amp;E proportion</i> | The area ratio of stromal region to all H&E regions.                          | H&E                |
| 35 | <i>Tumor: H&amp;E proportion</i>  | The area ratio of tumoral region to all H&E regions.                          | H&E                |
| 36 | <i>Lymph: H&amp;E proportion</i>  | The area ratio of lymphocytes aggregated region to all H&E regions.           | H&E                |



**Supplementary Table 2.** Confusion matrix in H&E segmentation results for HER2+ (A) and TNBC (B). Exclude: excluded region; Stroma: stromal region; Tumor: tumoral region; Lymph: lymphocytes aggregated region.

(A) HER2+

|             |         | Label predicted |         |        |       |
|-------------|---------|-----------------|---------|--------|-------|
|             |         | Exclude         | Stroma  | Tumor  | Lymph |
| Label truth | Exclude | 1013128         | 246813  | 20645  | 196   |
|             | Stroma  | 51214           | 3966505 | 52017  | 8137  |
|             | Tumor   | 43656           | 195743  | 853359 | 2008  |
|             | Lymph   | 11              | 32339   | 7855   | 59974 |

(B) TNBC

|             |         | Label predicted |         |        |        |
|-------------|---------|-----------------|---------|--------|--------|
|             |         | Exclude         | Stroma  | Tumor  | Lymph  |
| Label truth | Exclude | 1204848         | 140546  | 73137  | 375    |
|             | Stroma  | 113180          | 3596604 | 175049 | 2014   |
|             | Tumor   | 16424           | 213614  | 822769 | 17049  |
|             | Lymph   | 0               | 32729   | 31204  | 114058 |

**Supplementary Table 3.** Confusion matrix in IHC segmentation results for HER2+ (A) and TNBC (B). Exclude: excluded background region; CD8: CD8 region; CD163: CD163 region; PD-L1: PD-L1 region.

(A) HER2+

|             |         | Label predicted |        |       |       |
|-------------|---------|-----------------|--------|-------|-------|
|             |         | Exclude         | Stroma | Tumor | Lymph |
| Label truth | Exclude | 980285          | 8799   | 17195 | 16166 |
|             | Stroma  | 15168           | 83190  | 120   | 2785  |
|             | Tumor   | 19796           | 111    | 54759 | 1068  |
|             | Lymph   | 24832           | 4186   | 607   | 81653 |

(B) TNBC

|             |         | Label predicted |        |       |       |
|-------------|---------|-----------------|--------|-------|-------|
|             |         | Exclude         | Stroma | Tumor | Lymph |
| Label truth | Exclude | 1067720         | 4508   | 6006  | 9970  |
|             | Stroma  | 11948           | 59050  | 37    | 1520  |
|             | Tumor   | 16463           | 50     | 49179 | 7365  |
|             | Lymph   | 18702           | 1037   | 2867  | 54298 |

**Supplementary Table 4.** Non-rigid registration performances of HER2+ and TNBC cohorts.

| Cohort | Metric               | Before registration |        | After registration |        |
|--------|----------------------|---------------------|--------|--------------------|--------|
|        |                      | Mean                | Median | Mean               | Median |
| HER2+  | distance ( $\mu m$ ) | 374.01              | 278.73 | 33.31              | 18.23  |
|        | median <i>rTRE</i>   | 6.04                | 5.35   | 0.59               | 0.40   |
| TNBC   | distance ( $\mu m$ ) | 627.66              | 482.14 | 47.78              | 27.13  |
|        | median <i>rTRE</i>   | 6.46                | 5.85   | 0.44               | 0.27   |

**Supplementary Table 5.** Feature importance in HER2+ and TNBC cohorts. Experiments are repeated 20 times with different random seeds in leave-one-out cross-validation setting. Top 5 favorable and adverse prognosis marker for HER2+ and TNBC cohorts are reported respectively. Values are reported in mean  $\pm$  standard deviation.

| Cohort       | Favorable prognostic markers |            |                  |                     | Adverse prognostic markers |            |                |                      |
|--------------|------------------------------|------------|------------------|---------------------|----------------------------|------------|----------------|----------------------|
|              | Rank                         | H&E region | Feature          | Coefficients        | Rank                       | H&E region | Feature        | Coefficients         |
| <b>HER2+</b> | 1                            | Lymph      | CD8 ratio        | 0.7879 $\pm$ 0.0992 | 1                          | Clinical   | age            | -0.8638 $\pm$ 0.1346 |
|              | 2                            | Lymph      | CD163 ratio      | 0.7141 $\pm$ 0.0770 | 2                          | Stroma     | CD8 proportion | -0.4627 $\pm$ 0.0352 |
|              | 3                            | Clinical   | HER2/CEP17 ratio | 0.6414 $\pm$ 0.1010 | 3                          | Clinical   | ER%            | -0.4429 $\pm$ 0.0536 |
|              | 4                            | Lymph      | PD-L1 ratio      | 0.3748 $\pm$ 0.0653 | 4                          | Clinical   | PR+/-          | -0.4158 $\pm$ 0.0818 |
|              | 5                            | Tumor      | CD163 ratio      | 0.2219 $\pm$ 0.0726 | 5                          | Clinical   | PR%            | -0.2396 $\pm$ 0.0568 |
| <b>TNBC</b>  | 1                            | Lymph      | PD-L1 ratio      | 0.4412 $\pm$ 0.2300 | 1                          | Stroma     | CD8 proportion | -0.5878 $\pm$ 0.1024 |
|              | 2                            | Lymph      | PD-L1 proportion | 0.2409 $\pm$ 0.1095 | 2                          | Clinical   | age            | -0.0608 $\pm$ 0.0762 |
|              | 3                            | Tumor      | CD8 proportion   | 0.1249 $\pm$ 0.1827 | 3                          | Tumor      | PD-L1 ratio    | -0.0545 $\pm$ 0.1084 |
|              | 4                            | Tumor      | CD8 purity       | 0.0847 $\pm$ 0.1129 | 4                          | Stroma     | CD8 ratio      | -0.0472 $\pm$ 0.1059 |
|              | 5                            | Lymph      | CD163 proportion | 0.0452 $\pm$ 0.0994 | 5                          | Lymph      | CD8 purity     | -0.0249 $\pm$ 0.0739 |

**Supplementary Table 6.** Student's t-test results by comparing IMPRESS and clinical features of pCR cases against residual tumor cases. Features are sorted by adjusted P-values in ascending order. Symbol for adjusted P-values: \*: < 0.05; \*\*: < 0.01; \*\*\*: < 0.001. Significant P-values were highlighted in red.

| Rank | HER2+                             |              |                   | TNBC                              |              |                     |
|------|-----------------------------------|--------------|-------------------|-----------------------------------|--------------|---------------------|
|      | Feature names                     | t statistics | Adjusted P-value  | Feature names                     | t statistics | Adjusted P-value    |
| 1    | <i>Lymph: CD163 ratio</i>         | 3.594455     | <b>0.016305 *</b> | <i>Stroma: CD8 proportion</i>     | -4.666563    | <b>0.000623 ***</b> |
| 2    | <i>Lymph: CD8 ratio</i>           | 3.541561     | <b>0.016305 *</b> | <i>Stroma: PD-L1 proportion</i>   | -4.242431    | <b>0.001389 **</b>  |
| 3    | <i>Clinical: HER2/CEP17 ratio</i> | 3.226637     | <b>0.028426 *</b> | <i>Lymph: PD-L1 ratio</i>         | 3.517819     | <b>0.008316 **</b>  |
| 4    | <i>Stroma: CD8 proportion</i>     | -3.072326    | <b>0.029197 *</b> | <i>Lymph: PD-L1 proportion</i>    | 3.488683     | <b>0.008316 **</b>  |
| 5    | <i>Lymph: PD-L1 ratio</i>         | 3.042724     | <b>0.029197 *</b> | <i>Lymph: CD163 proportion</i>    | 3.376036     | <b>0.009426 **</b>  |
| 6    | <i>Tumor: CD163 purity</i>        | -2.971149    | <b>0.029842 *</b> | <i>Stroma: CD163 proportion</i>   | -3.076857    | <b>0.019193 *</b>   |
| 7    | <i>Clinical: ER%</i>              | -2.902422    | <b>0.031035 *</b> | <i>Lymph: CD8 proportion</i>      | 2.948188     | <b>0.023794 *</b>   |
| 8    | <i>Lymph: CD8 proportion</i>      | 2.825048     | <b>0.031122 *</b> | <i>Stroma: H&amp;E proportion</i> | -2.830533    | <b>0.028934 *</b>   |
| 9    | <i>Clinical: PR%</i>              | -2.810583    | <b>0.031122 *</b> | <i>Lymph: PD-L1 purity</i>        | 2.736953     | <b>0.031908 *</b>   |
| 10   | <i>Clinical: PR</i>               | -2.741490    | <b>0.033801 *</b> | <i>Tumor: CD8 proportion</i>      | 2.712844     | <b>0.031908 *</b>   |
| 11   | <i>Lymph: CD163 proportion</i>    | 2.370234     | 0.069208          | <i>Lymph: H&amp;E proportion</i>  | 2.552162     | <b>0.044346 *</b>   |
| 12   | <i>Clinical: ER</i>               | -2.353331    | 0.069208          | <i>Tumor: PD-L1 proportion</i>    | 2.166371     | 0.098426            |
| 13   | <i>All: CD163 ratio</i>           | 2.341825     | 0.069208          | <i>Tumor: H&amp;E proportion</i>  | 2.160806     | 0.098426            |
| 14   | <i>Stroma: CD8 ratio</i>          | 2.278235     | 0.069208          | <i>Clinical: age</i>              | -2.055501    | 0.116414            |
| 15   | <i>Tumor: PD-L1 purity</i>        | 2.255415     | 0.069208          | <i>Tumor: CD163 purity</i>        | -1.975628    | 0.129875            |
| 16   | <i>Stroma: CD163 ratio</i>        | 2.249187     | 0.069208          | <i>Stroma: PD-L1 ratio</i>        | 1.920414     | 0.137381            |
| 17   | <i>All: CD8 ratio</i>             | 2.247796     | 0.069208          | <i>All: PD-L1 purity</i>          | 1.890408     | 0.137943            |
| 18   | <i>All: CD163 purity</i>          | -2.205629    | 0.069208          | <i>Lymph: CD163 ratio</i>         | 1.827774     | 0.143418            |
| 19   | <i>All: PD-L1 ratio</i>           | 2.204862     | 0.069208          | <i>Tumor: PD-L1 purity</i>        | 1.819611     | 0.143418            |
| 20   | <i>Clinical: age</i>              | -2.078504    | 0.088090          | <i>All: PD-L1 ratio</i>           | 1.788630     | 0.145336            |
| 21   | <i>Stroma: PD-L1 proportion</i>   | -2.035503    | 0.088498          | <i>Stroma: PD-L1 purity</i>       | 1.695521     | 0.163010            |
| 22   | <i>Stroma: PD-L1 ratio</i>        | 2.034231     | 0.088498          | <i>Tumor: CD163 proportion</i>    | 1.685473     | 0.163010            |
| 23   | <i>Tumor: CD8 ratio</i>           | 1.770354     | 0.149279          | <i>All: CD163 purity</i>          | -1.659165    | 0.164301            |
| 24   | <i>Tumor: PD-L1 ratio</i>         | 1.665460     | 0.165989          | <i>Stroma: CD163 ratio</i>        | 1.549523     | 0.194783            |
| 25   | <i>Lymph: PD-L1 proportion</i>    | 1.661584     | 0.165989          | <i>All: CD163 ratio</i>           | 1.512692     | 0.198751            |
| 26   | <i>Tumor: CD163 ratio</i>         | 1.656927     | 0.165989          | <i>Lymph: CD8 ratio</i>           | 1.496247     | 0.198751            |
| 27   | <i>Lymph: H&amp;E proportion</i>  | 1.505547     | 0.213780          | <i>Tumor: CD8 ratio</i>           | 1.354115     | 0.247509            |
| 28   | <i>Stroma: CD163 purity</i>       | -1.481817    | 0.215433          | <i>Stroma: CD163 purity</i>       | -1.161706    | 0.323018            |
| 29   | <i>All: PD-L1 purity</i>          | 1.449248     | 0.220826          | <i>Lymph: CD8 purity</i>          | -1.148333    | 0.323018            |
| 30   | <i>Stroma: CD163 proportion</i>   | -1.328562    | 0.263135          | <i>Tumor: PD-L1 ratio</i>         | 1.132209     | 0.323018            |
| 31   | <i>Stroma: H&amp;E proportion</i> | -1.312893    | 0.263135          | <i>All: CD8 ratio</i>             | 1.015053     | 0.374804            |
| 32   | <i>All: CD8 purity</i>            | 1.286521     | 0.266704          | <i>Lymph: CD163 purity</i>        | -0.878047    | 0.443200            |
| 33   | <i>Tumor: CD8 proportion</i>      | 1.242422     | 0.278619          | <i>Tumor: CD163 ratio</i>         | 0.695981     | 0.548319            |
| 34   | <i>Tumor: CD8 purity</i>          | 1.179454     | 0.300020          | <i>Tumor: CD8 purity</i>          | 0.561242     | 0.617441            |
| 35   | <i>Tumor: PD-L1 proportion</i>    | 1.156670     | 0.302390          | <i>Stroma: CD8 ratio</i>          | 0.550337     | 0.617441            |
| 36   | <i>Stroma: PD-L1 purity</i>       | 1.005040     | 0.372066          | <i>All: CD8 purity</i>            | 0.349839     | 0.747858            |

|    |                                  |           |          |                           |          |          |
|----|----------------------------------|-----------|----------|---------------------------|----------|----------|
| 37 | <i>Stroma: CD8 purity</i>        | 0.938257  | 0.399425 | <i>Stroma: CD8 purity</i> | 0.148199 | 0.882666 |
| 38 | <i>Tumor: H&amp;E proportion</i> | 0.830702  | 0.448729 |                           |          |          |
| 39 | <i>Lymph: CD163 purity</i>       | -0.817853 | 0.448729 |                           |          |          |
| 40 | <i>Lymph: CD8 purity</i>         | 0.630844  | 0.557065 |                           |          |          |
| 41 | <i>Lymph: PD-L1 purity</i>       | 0.246588  | 0.825729 |                           |          |          |
| 42 | <i>Tumor: CD163 proportion</i>   | -0.043845 | 0.965174 |                           |          |          |

---

**Supplementary Table 7.** Spearman's rank correlation coefficient statistics between IMPRESS features and residual cancer burden (RCB) values in HER2+ and TNBC cohorts. Features are sorted by adjusted P-values in ascending order. Symbol for adjusted P-values: \*: < 0.05; \*\*: < 0.01; \*\*\*: < 0.001. Significant P-values were highlighted in red.

| Rank | HER2+                             |                 | TNBC               |                                   |                 |                   |
|------|-----------------------------------|-----------------|--------------------|-----------------------------------|-----------------|-------------------|
|      | Feature names                     | Spearman $\rho$ | Adjusted P-value   | Feature names                     | Spearman $\rho$ | Adjusted P-value  |
| 1    | <i>Lymph: CD163 ratio</i>         | -0.501054       | <b>0.001208 **</b> | <i>Stroma: CD8 proportion</i>     | 0.434782        | <b>0.011902 *</b> |
| 2    | <i>Lymph: CD8 ratio</i>           | -0.474161       | <b>0.001782 **</b> | <i>Stroma: PD-L1 proportion</i>   | 0.398219        | <b>0.020133 *</b> |
| 3    | <i>Tumor: CD8 ratio</i>           | -0.459897       | <b>0.002034 **</b> | <i>Lymph: PD-L1 proportion</i>    | -0.380247       | <b>0.023275 *</b> |
| 4    | <i>All: CD8 ratio</i>             | -0.442734       | <b>0.002828 **</b> | <i>Lymph: CD8 proportion</i>      | -0.318356       | 0.078079          |
| 5    | <i>Stroma: CD8 ratio</i>          | -0.381315       | <b>0.013308 *</b>  | <i>Lymph: CD163 proportion</i>    | -0.313238       | 0.078079          |
| 6    | <i>Tumor: PD-L1 ratio</i>         | -0.374829       | <b>0.013308 *</b>  | <i>Lymph: H&amp;E proportion</i>  | -0.308882       | 0.078079          |
| 7    | <i>Tumor: CD163 purity</i>        | 0.370868        | <b>0.013308 *</b>  | <i>Lymph: PD-L1 ratio</i>         | -0.298432       | 0.085415          |
| 8    | <i>Lymph: PD-L1 ratio</i>         | -0.369318       | <b>0.013308 *</b>  | <i>All: PD-L1 ratio</i>           | -0.251490       | 0.180450          |
| 9    | <i>All: PD-L1 ratio</i>           | -0.365530       | <b>0.013308 *</b>  | <i>All: PD-L1 purity</i>          | -0.244230       | 0.180450          |
| 10   | <i>Stroma: PD-L1 ratio</i>        | -0.363377       | <b>0.013308 *</b>  | <i>Stroma: H&amp;E proportion</i> | 0.240374        | 0.180450          |
| 11   | <i>Stroma: CD8 proportion</i>     | 0.335825        | <b>0.024939 *</b>  | <i>Tumor: PD-L1 ratio</i>         | -0.237279       | 0.180450          |
| 12   | <i>Lymph: CD8 proportion</i>      | -0.323799       | <b>0.030667 *</b>  | <i>Lymph: PD-L1 purity</i>        | -0.236280       | 0.180450          |
| 13   | <i>Lymph: CD163 proportion</i>    | -0.320585       | <b>0.030667 *</b>  | <i>Lymph: CD163 ratio</i>         | -0.224116       | 0.205650          |
| 14   | <i>Tumor: PD-L1 purity</i>        | -0.288612       | 0.058911           | <i>Stroma: PD-L1 ratio</i>        | -0.220497       | 0.205650          |
| 15   | <i>All: CD163 purity</i>          | 0.282930        | 0.062082           | <i>Tumor: PD-L1 purity</i>        | -0.211619       | 0.211425          |
| 16   | <i>All: CD163 ratio</i>           | -0.273946       | 0.070192           | <i>Stroma: PD-L1 purity</i>       | -0.208619       | 0.211425          |
| 17   | <i>Stroma: CD163 ratio</i>        | -0.247657       | 0.110738           | <i>Tumor: CD163 purity</i>        | 0.207548        | 0.211425          |
| 18   | <i>Tumor: CD8 purity</i>          | -0.241343       | 0.117597           | <i>Tumor: CD8 proportion</i>      | -0.203216       | 0.214561          |
| 19   | <i>All: CD8 purity</i>            | -0.237497       | 0.119504           | <i>Stroma: CD163 proportion</i>   | 0.196170        | 0.217098          |
| 20   | <i>Lymph: H&amp;E proportion</i>  | -0.229489       | 0.130990           | <i>Tumor: PD-L1 proportion</i>    | -0.196003       | 0.217098          |
| 21   | <i>Stroma: PD-L1 proportion</i>   | 0.220535        | 0.145700           | <i>Tumor: H&amp;E proportion</i>  | -0.184291       | 0.248396          |
| 22   | <i>Lymph: PD-L1 proportion</i>    | -0.217550       | 0.146004           | <i>Tumor: CD8 ratio</i>           | -0.171889       | 0.285410          |
| 23   | <i>All: PD-L1 purity</i>          | -0.215024       | 0.146004           | <i>All: CD163 purity</i>          | 0.167914        | 0.287296          |
| 24   | <i>Stroma: CD163 purity</i>       | 0.200301        | 0.168731           | <i>All: CD8 ratio</i>             | -0.165391       | 0.287296          |
| 25   | <i>Tumor: CD163 ratio</i>         | -0.200014       | 0.168731           | <i>All: CD163 ratio</i>           | -0.156821       | 0.310888          |
| 26   | <i>Stroma: PD-L1 purity</i>       | -0.198234       | 0.168731           | <i>Stroma: CD163 ratio</i>        | -0.140111       | 0.373130          |
| 27   | <i>Tumor: CD8 proportion</i>      | -0.196139       | 0.168731           | <i>Tumor: CD163 ratio</i>         | -0.125543       | 0.402711          |
| 28   | <i>Stroma: CD8 purity</i>         | -0.170194       | 0.239141           | <i>Stroma: CD8 ratio</i>          | -0.125448       | 0.402711          |
| 29   | <i>Stroma: CD163 proportion</i>   | 0.132281        | 0.379133           | <i>Lymph: CD8 ratio</i>           | -0.125162       | 0.402711          |
| 30   | <i>Tumor: PD-L1 proportion</i>    | -0.115835       | 0.443951           | <i>Lymph: CD8 purity</i>          | 0.120020        | 0.403368          |
| 31   | <i>Lymph: CD163 purity</i>        | 0.107283        | 0.472141           | <i>Stroma: CD163 purity</i>       | 0.119401        | 0.403368          |
| 32   | <i>Stroma: H&amp;E proportion</i> | 0.095343        | 0.518670           | <i>Lymph: CD163 purity</i>        | 0.110618        | 0.432231          |
| 33   | <i>Lymph: CD8 purity</i>          | -0.090722       | 0.527063           | <i>Tumor: CD163 proportion</i>    | -0.094931       | 0.496983          |
| 34   | <i>Tumor: CD163 proportion</i>    | 0.022932        | 0.910140           | <i>Tumor: CD8 purity</i>          | -0.087194       | 0.522288          |
| 35   | <i>Tumor: H&amp;E proportion</i>  | -0.012714       | 0.948208           | <i>All: CD8 purity</i>            | -0.045561       | 0.741317          |
| 36   | <i>Lymph: PD-L1 purity</i>        | -0.000718       | 0.995584           | <i>Stroma: CD8 purity</i>         | -0.013259       | 0.917181          |

**Supplementary Table 8.** Performances in HER2+ and TNBC external validation cohorts. Experiments used the previous established LASSO-regularized logistic regression model (repeated 20 times with different random seeds in leave-one-out cross-validation setting). mean value  $\pm$  standard deviation are reported. PPV: positive predictive value; NPV: negative predictive value.

| Cohort       | AUC                 | F1 score            | Precision (PPV)     | Recall              | NPV                 |
|--------------|---------------------|---------------------|---------------------|---------------------|---------------------|
| <b>HER2+</b> | 0.9005 $\pm$ 0.0060 | 0.5714 $\pm$ 0.0000 | 1.0000 $\pm$ 0.0000 | 0.4000 $\pm$ 0.0000 | 0.6250 $\pm$ 0.0000 |
| <b>TNBC</b>  | 0.5865 $\pm$ 0.0157 | 0.4882 $\pm$ 0.0148 | 0.6286 $\pm$ 0.0479 | 0.4000 $\pm$ 0.0000 | 0.5582 $\pm$ 0.0166 |



**Supplementary Table 9. HER2+ study cohort metadata.**

| Unique ID | Age | HER2/CEP17 ratio | ER (+-1/-0) | ER% | ER (1-3+) | PR (+/-) | PR% | PR (1-3+) | Residual tumor size (cm) | pCR (no-0, yes-1) | RCB value |
|-----------|-----|------------------|-------------|-----|-----------|----------|-----|-----------|--------------------------|-------------------|-----------|
| 061       | 46  | 4.58             | 1           | 95  | 3         | 1        | 95  | 3         | 1.4                      | 0                 | 1.375     |
| 062       | 51  | 6.03             | 1           | 98  | 3         | 1        | 90  | 3         | 7                        | 0                 | 3.213     |
| 063       | 57  | 4.79             | 1           | 95  | 2         | 1        | 95  | 2         | 0.9                      | 0                 | 2.066     |
| 064       | 55  | 3.09             | 1           | 95  | 3         | 1        | 10  | 2         | 4.4                      | 0                 | 4.138     |
| 065       | 66  | 6.34             | 1           | 95  | 3         | 0        | 0   | 0         |                          | 1                 |           |
| 066       | 75  | 4.65             | 0           | 0   | 0         | 0        | 0   | 0         | 0.8                      | 0                 | 1.131     |
| 067       | 57  | 3.13             | 0           | 0   | 0         | 0        | 0   | 0         | 1.4                      | 0                 | 3.046     |
| 068       | 62  | 3.93             | 0           | 0   | 0         | 0        | 0   | 0         | 2.1                      | 0                 | 3.745     |
| 069       | 62  | 7.94             | 0           | 0   | 0         | 0        | 0   | 0         |                          | 1                 |           |
| 070       | 65  | 6.04             | 1           | 95  | 3         | 1        | 50  | 2         | 0.7                      | 0                 | 0.933     |
| 071       | 51  | 7.42             | 1           | 90  | 3         | 1        | 80  | 2         |                          | 1                 |           |
| 072       | 51  | 7.06             | 1           | 90  | 3         | 1        | 60  | 2         |                          | 1                 |           |
| 073       | 60  | 13.32            | 0           | 0   | 0         | 0        | 0   | 0         |                          | 1                 |           |
| 074       | 56  | 4.37             | 1           | 95  | 3         | 0        | 0   | 0         | 0.7                      | 0                 | 1.075     |
| 075       | 64  | 2.28             | 0           | 0   | 0         | 0        | 0   | 0         |                          | 1                 |           |
| 076       | 70  | 9.32             | 0           | 0   | 0         | 0        | 0   | 0         |                          | 1                 |           |
| 077       | 76  | 6.06             | 1           | 95  | 3         | 1        | 95  | 3         | 0.3                      | 0                 | 1.141     |
| 078       | 37  | 6.43             | 0           | 0   | 0         | 0        | 0   | 0         |                          | 1                 |           |
| 079       | 56  | 2.09             | 0           | 0   | 0         | 0        | 0   | 0         | 2.5                      | 0                 | 2.25      |
| 080       | 56  | 1.23             | 0           | 0   | 0         | 0        | 0   | 0         | 2.5                      | 0                 | 2.39      |
| 082       | 64  | 3.82             | 1           | 80  | 2         | 0        | 0   | 0         |                          | 1                 |           |
| 083       | 30  | 2.30             | 0           | 0   | 0         | 0        | 0   | 0         |                          | 1                 |           |
| 084       | 45  | 5.17             | 1           | 1   | 1         | 0        | 0   | 0         |                          | 1                 |           |
| 085       | 56  | 10.40            | 1           | 90  | 2         | 0        | 0   | 0         |                          | 1                 |           |
| 086       | 52  | 6.75             | 0           | 0   | 0         | 0        | 0   | 0         |                          | 1                 |           |
| 087       | 61  | 6.70             | 1           | 20  | 2         | 0        | 0   | 0         |                          | 1                 |           |
| 088       | 30  | 5.46             | 0           | 0   | 0         | 0        | 0   | 0         |                          | 1                 |           |
| 089       | 54  | 11.20            | 0           | 0   | 0         | 0        | 0   | 0         |                          | 1                 |           |
| 090       | 59  | 3.50             | 0           | 0   | 0         | 0        | 0   | 0         | 1.3                      | 0                 | 3.084     |
| 091       | 34  | 7.60             | 0           | 0   | 0         | 0        | 0   | 0         |                          | 1                 |           |
| 092       | 55  | 12.40            | 1           | 40  | 2         | 0        | 0   | 0         |                          | 1                 |           |
| 093       | 65  | 8.15             | 1           | 95  | 3         | 1        | 50  | 2         | 0.25                     | 0                 | 1.085     |
| 094       | 67  | 7.13             | 0           | 0   | 0         | 0        | 0   | 0         |                          | 1                 |           |
| 095       | 37  | 7.06             | 0           | 0   | 0         | 0        | 0   | 0         |                          | 1                 |           |
| 096       | 58  | 7.61             | 1           | 10  | 1         | 0        | 0   | 0         |                          | 1                 |           |
| 097       | 58  | 4.97             | 1           | 30  | 2         | 0        | 0   | 0         | 0.8                      | 0                 | 1.388     |
| 098       | 65  | 8.67             | 0           | 0   | 0         | 0        | 0   | 0         | 0.21                     | 1                 |           |
| 099       | 61  | 13.49            | 0           | 0   | 0         | 0        | 0   | 0         |                          | 1                 |           |
| 101       | 57  | 14.99            | 0           | 0   | 0         | 0        | 0   | 0         | 2.2                      | 0                 | 1.048     |
| 102       | 40  | 6.46             | 1           | 90  | 3         | 1        | 40  | 2         | 0.8                      | 0                 | 0.911     |
| 103       | 57  | 10.09            | 1           | 90  | 3         | 1        | 2   | 2         |                          | 1                 |           |
| 104       | 41  | 8.66             | 1           | 95  | 3         | 1        | 2   | 1         |                          | 1                 |           |
| 105       | 49  | 2.80             | 1           | 95  | 3         | 0        | 0   | 0         | 2.1                      | 0                 | 1.387     |
| 106       | 67  | 8.51             | 1           | 90  | 3         | 1        | 9   | 2         | 0.6                      | 0                 | 1.102     |
| 107       | 57  | 8.15             | 0           | 0   | 0         | 0        | 0   | 0         |                          | 1                 |           |
| 108       | 54  | 19.06            | 0           | 0   | 0         | 0        | 0   | 0         |                          | 1                 |           |
| 109       | 45  | 15.00            | 0           | 0   | 0         | 0        | 0   | 0         |                          | 1                 |           |
| 110       | 49  | 2.10             | 1           | 85  | 2         | 1        | 95  | 3         | 0.5                      | 0                 | 1.472     |
| 111       | 65  | 1.89             | 1           | 50  | 2         | 0        | 0   | 0         | 0.3                      | 0                 | 1.141     |
| 112       | 59  | 2.29             | 1           | 100 | 3         | 1        | 30  | 2         |                          | 1                 |           |
| 113       | 48  | 3.38             | 0           | 0   | 0         | 0        | 0   | 0         |                          | 1                 |           |
| 114       | 55  | 11.78            | 0           | 0   | 0         | 0        | 0   | 0         |                          | 1                 |           |
| 115       | 49  | 7.40             | 0           | 0   | 0         | 0        | 0   | 0         | 0.6                      | 0                 | 1.812     |
| 116       | 45  | 22.98            | 0           | 0   | 0         | 0        | 0   | 0         |                          | 1                 |           |
| 117       | 59  | 7.96             | 0           | 0   | 0         | 0        | 0   | 0         |                          | 1                 |           |
| 118       | 55  | 3.59             | 1           | 90  | 3         | 1        | 2   | 2         | 0.1                      | 0                 | 0.947     |
| 119       | 61  | 8.73             | 1           | 100 | 3         | 1        | 60  | 3         | 1.6                      | 0                 | 1.741     |
| 120       | 59  | 7.61             | 0           | 0   | 0         | 0        | 0   | 0         |                          | 1                 |           |
| 121       | 53  | 6.38             | 0           | 0   | 0         | 0        | 0   | 0         |                          | 1                 |           |
| 122       | 48  | 4.24             | 1           | 95  | 3         | 1        | 30  | 3         |                          | 1                 |           |
| 123       | 45  | 7.66             | 1           | 95  | 3         | 1        | 80  | 2         |                          | 1                 |           |
| 124       | 38  | 7.02             | 0           | 0   | 0         | 0        | 0   | 0         |                          | 1                 |           |

**Supplementary Table 10. TNBC study cohort metadata.**

| Unique ID | Age | Residual tumor size (cm)                   | pCR (no-0, yes-1) | RCB value |
|-----------|-----|--------------------------------------------|-------------------|-----------|
| 901       | 35  |                                            | 1                 |           |
| 902       | 62  | 0.2                                        | 0                 | 2.74      |
| 904       | 50  | 0.6                                        | 0                 | 1.046     |
| 905       | 49  | 3.4                                        | 0                 | 2.313     |
| 906       | 53  | 1.9                                        | 0                 | 3.653     |
| 907       | 74  | 0.4                                        | 0                 | 0.953     |
| 908       | 47  | 1.2                                        | 0                 | 2.421     |
| 909       | 55  | 1.5                                        | 0                 | 0.798     |
| 910       | 57  | 1.4                                        | 0                 | 2.575     |
| 911       | 73  |                                            | 1                 |           |
| 912       | 46  | 1.7                                        | 0                 | 2.067     |
| 913       | 46  | 1.8                                        | 0                 | 2.014     |
| 914       | 50  | 0.5                                        | 0                 | 1.244     |
| 915       | 66  |                                            | 1                 |           |
| 916       | 59  | 0.4                                        | 0                 | 1.668     |
| 917       | 46  | 3.2                                        | 0                 | 4.267     |
| 918       | 37  |                                            | 1                 |           |
| 919       | 53  |                                            | 1                 |           |
| 920       | 49  | 0.6                                        | 0                 | 2.771     |
| 921       | 46  | 4.0 (largest span, largest continuous 0.2) | 0                 | 2.661     |
| 922       | 40  | 0.13                                       | 0                 | 1.037     |
| 923       | 36  |                                            | 1                 |           |
| 924       | 55  |                                            | 1                 |           |
| 925       | 49  |                                            | 1                 |           |
| 926       | 37  | 1                                          | 0                 | 1.32      |
| 927       | 29  |                                            | 1                 |           |
| 928       | 57  |                                            | 1                 |           |
| 929       | 29  |                                            | 1                 |           |
| 931       | 35  | 0.02                                       | 0                 | 1.532     |
| 932       | 66  | 0.3                                        | 0                 | 1.444     |
| 933       | 59  | tumor bed 3.5 (foci 0.1-0.2)               | 0                 | 3.135     |
| 934       | 31  | 0.6                                        | 0                 | 2.227     |
| 935       | 51  | 3.9                                        | 0                 | 4.031     |
| 936       | 57  | 0.12                                       | 0                 | 2.287     |
| 937       | 52  | 0.11                                       | 0                 | 1.074     |
| 938       | 42  |                                            | 1                 |           |
| 939       | 39  |                                            | 1                 |           |
| 940       | 35  |                                            | 1                 |           |
| 941       | 63  | 0.7                                        | 0                 | 1.156     |
| 942       | 51  |                                            | 1                 |           |
| 943       | 53  |                                            | 1                 |           |
| 944       | 66  | 0.2                                        | 0                 | 0.947     |
| 945       | 33  |                                            | 1                 |           |
| 946       | 65  | 0.07                                       | 0                 | 0.891     |
| 947       | 64  |                                            | 1                 |           |
| 948       | 54  | 1.5                                        | 0                 | 1.753     |
| 949       | 56  | 1.1                                        | 0                 | 2.843     |
| 950       | 48  | 1.8                                        | 0                 | 1.78      |
| 951       | 56  | 3.6                                        | 0                 | 4.09      |
| 952       | 51  | 4.9                                        | 0                 | 2.51      |
| 953       | 53  |                                            | 1                 |           |
| 954       | 42  |                                            | 1                 |           |
| 955       | 53  | 0.15                                       | 0                 | 0.98      |
| 956       | 59  | 0.53                                       | 0                 | 2.308     |
| 957       | 59  |                                            | 1                 |           |
| 958       | 66  | 0.3                                        | 0                 | 1.444     |
| 959       | 26  |                                            | 1                 |           |
| 960       | 48  |                                            | 1                 |           |
| 961       | 48  |                                            | 1                 |           |
| 987       | 40  |                                            | 1                 |           |
| 988       | 49  | 0.1                                        | 0                 | 0.841     |
| 989       | 64  |                                            | 1                 |           |
| 990       | 66  |                                            | 1                 |           |
| 991       | 66  | 2.5                                        | 0                 | 2.032     |
